# Supplementary material
Source: publisher figshare collection journal article supplement (https://gsapubs.figshare.com/ndownloader/files/30834415)
Supplement: Supplementary file 1 [file 30834415]

## Sheet: Sheet1
Supplementary Table 6
Whole-rock Sr-Nd isotopic data of the Daocheng batholith.
Sample	87Rb/86Sr	87Sr/86Sr	2σ, 10-6	147Sm/144Nd	143Nd/144Nd	2σ, 10-6	(87Sr/86Sr)i	(143Nd/144Nd)i	εNd (t)	T2DM(Ma)
MME I
18DC43	0.939135	0.710261	15	0.153152	0.512248	5	0.70738	0.512032	-6.4	1513
18DC48	0.483663	0.709364	9	0.143729	0.512201	4	0.707878	0.511998	-7.06766	1567
MME II
18DC44	1.05349	0.709659	9	0.131346	0.512193	5	0.70642	0.512007	-6.89	1554
18DC65	2.14408	0.716528	13	0.174974	0.512215	4	0.70994	0.511968	-7.65	1608
Quartz diorite
18DC35	0.76764	0.709199	10	0.162943	0.512284	4	0.70685	0.512055	-5.98	1476
18DC45	0.479992	0.708817	10	0.137058	0.512211	8	0.70734	0.512017	-6.69	1537
18DC46	0.662109	0.709354	11	0.139055	0.512221	5	0.70732	0.512025	-6.54	1526
Granodiorite
18DC42	0.883895	0.710969	10	0.128294	0.512194	4	0.70825	0.512013	-6.77	1546
18DC47	0.682584	0.709374	10	0.11654	0.512196	4	0.70728	0.512031	-6.42	1517
18DC51	0.693405	0.709687	8	0.127851	0.512188	4	0.70756	0.512007	-6.89	1554
Monzogranite
18DC29	1.07006	0.710177	8	0.102927	0.512191	4	0.70691	0.512046	-6.15	1495
18DC41	1.63451	0.712271	9	0.121519	0.512209	3	0.70725	0.512037	-6.3	1507
18DC52	2.69836	0.717731	9	0.118861	0.512175	4	0.70944	0.512007	-6.89	1555
18DC63	2.28373	0.717139	12	0.119166	0.512138	4	0.71012	0.51197	-7.61	1615
18DC68	4.66558	0.725282	9	0.146741	0.512106	4	0.71095	0.511899	-9	1723
